# Supplementary material
Source: PubMed Central journal article supplement (PMC7098003)
Supplement: ao9b04325_si_001.pdf [file ao9b04325_si_001.pdf]

## Supporting Information

### Calibration of non-stationary gas sensors based on two-dimensional materials

Filiberto Ricciardella\*<sup>§</sup>, Kangho Lee<sup>§</sup>, Tobias Stelz<sup>§</sup>, Oliver Hartwig<sup>§</sup>, Maximilian Prechtl<sup>§</sup>, Mark McCrystall<sup>#</sup>, Niall McEvoy<sup>€</sup> and Georg S. Duesberg\*<sup>§</sup>

<sup>§</sup>Universitaet der Bundeswehr Muenchen, Institute for Physics, EIT 2, Werner-Heisenberg-Weg 39, 85577 Neubiberg, Germany

<sup>#</sup>School of Physics, Trinity College Dublin, Dublin 2, Ireland

<sup>€</sup>Advanced Materials and Bioengineering Research Centre (AMBER) and School of Chemistry, Trinity College Dublin, Dublin 2, Ireland

\*Corresponding authors: [filiberto.ricciardella@gmail.com](mailto:filiberto.ricciardella@gmail.com); [duesberg@unibw.de](mailto:duesberg@unibw.de)

#### SENSOR ANALYSES

Table S1. Sheet resistance ( $R_s$ ) values of PtSe<sub>2</sub>-based resistors.

| Device | Pads  | Sheet resistance (k $\Omega$ /sq) |
|--------|-------|-----------------------------------|
| #1     | 2-3   | 130                               |
| #2     | 4-5   | 840                               |
| #3     | 5-6   | 490                               |
| #4     | 6-7   | 790                               |
| #5     | 7-8   | 680                               |
| #6     | 8-9   | 320                               |
| #7     | 9-10  | 245                               |
| #8     | 10-11 | 420                               |

Table S1 reports the values of the sheet resistance ( $R_s$ ) of the eight sensors based on PtSe<sub>2</sub>.

Figure S1 illustrates the real-time current behavior (panel a) and TDSO (panel b) of PtSe<sub>2</sub>-based chemi-resistors (CR) upon sequential exposures of NO<sub>2</sub> (red rectangles).

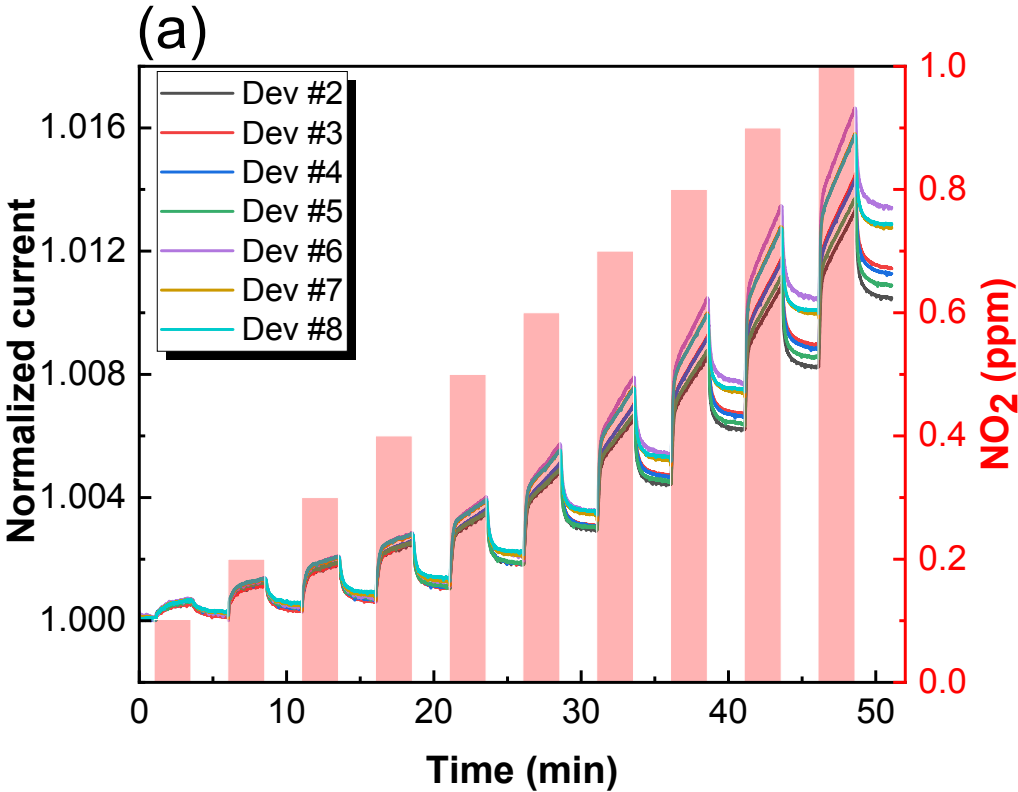

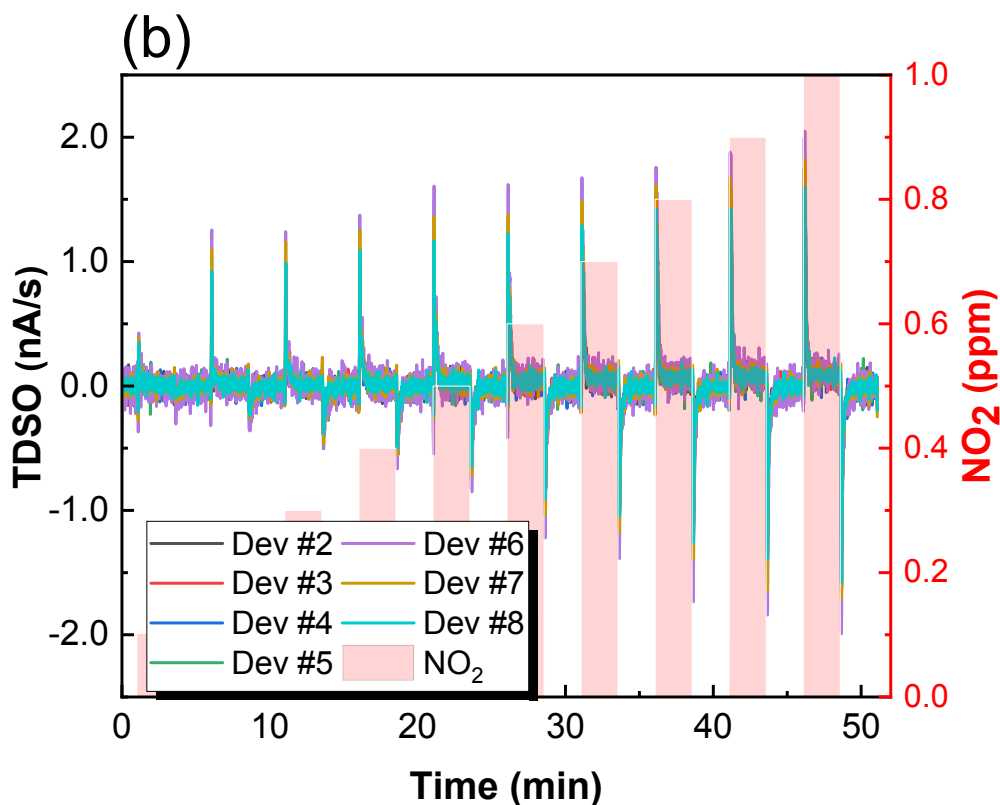

Figure S1. (a) Real-time behaviour and (b) corresponding TDSO of PtSe<sub>2</sub>-based devices (from #2 to #8) during the exposure upon NO<sub>2</sub> (red rectangles). The current in panel (a) is normalized at the value  $I_0$  reached at the gas inlet of the first pulse exposure.

In both panels, the curves are closely overlapped, showing the reproducible sensing behavior of the devices.

TDSO maxima obtained from figure S1a are reported in the main text, showing the linear behavior of TDSO maxima as a function of the NO<sub>2</sub> concentration for the investigated PtSe<sub>2</sub>-CRs.

In figure S2(a), the close-up of the exposure step upon 1 ppm (black line) and corresponding TDSO (red line) are reported. The dashed lines highlight the position of the gas inlet ( $t_0$ ) and TDSO maximum ( $t_1$ ).

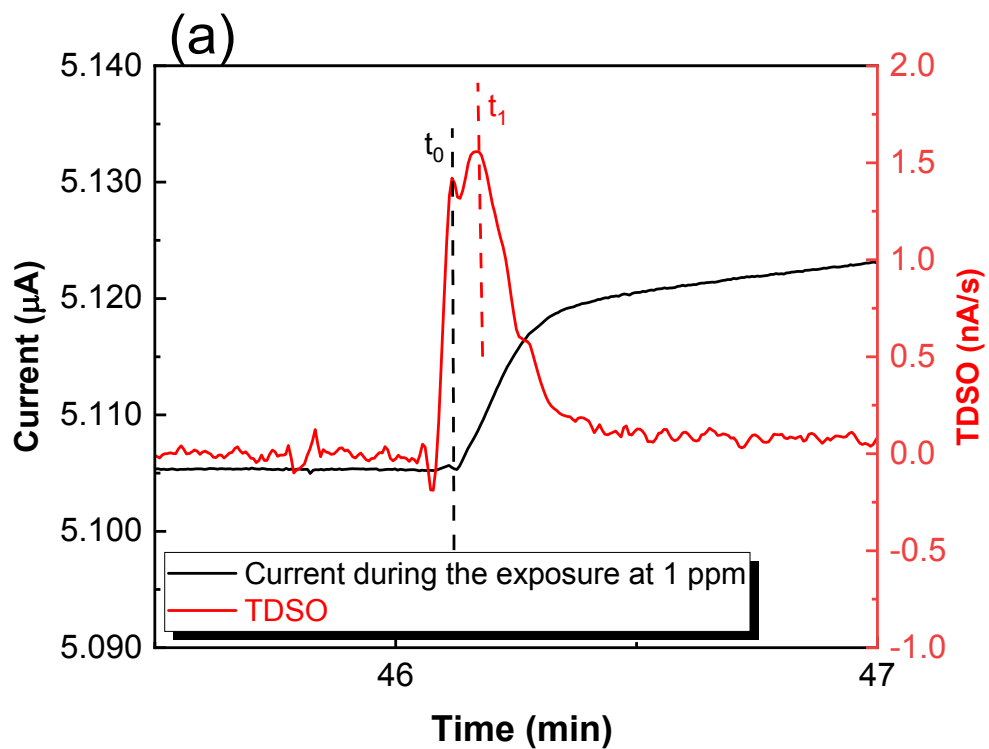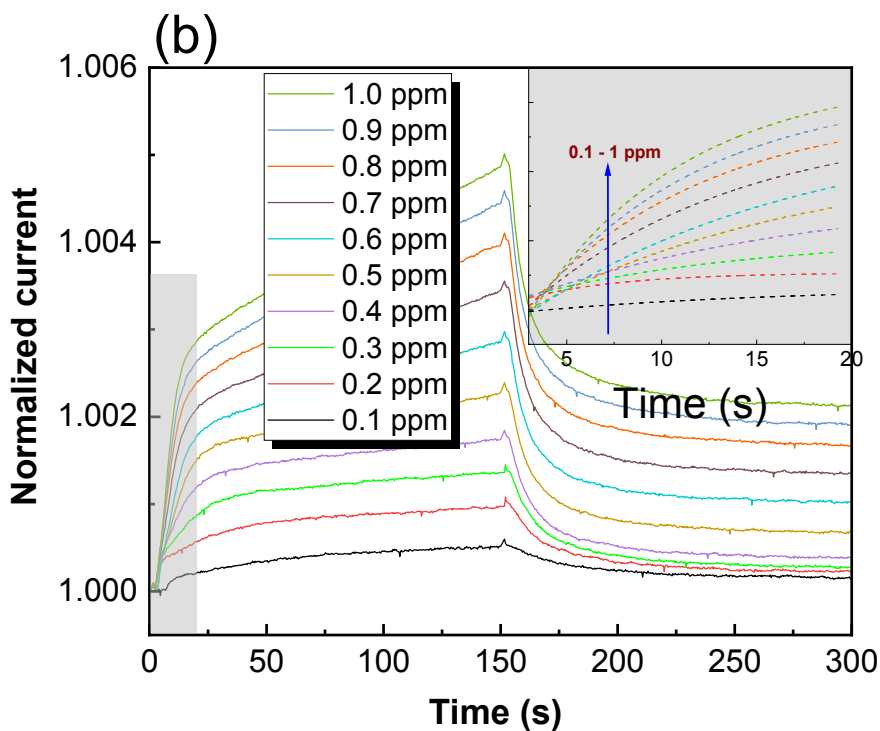

Figure S2. (a) Zoom on the current signal upon  $\text{NO}_2$  pulse at 1 ppm (black line) and the corresponding TDSO (red line). (b) Signals recorded by *PtSe2-CR #1* upon exposure to different concentrations (see main text). Inset: fit of the curves enclosed in the grey rectangle of the panel.

The TDSO peak lies only few seconds later the instant of the gas injection, as expected by the mathematical model presented in our previous work<sup>1</sup>. The short delay between  $t_0$  and  $t_1$  is further clarified in figure S2(b). The grey rectangle of the figure highlights the portion of the signal which originates the peak of TDSO. Fitting this part of the signal (inset of Figure S2), a rising time ( $\tau_1$ ) of about few seconds is determined. As proved in our previous work, the smaller  $\tau_1$ , the closer  $t_0$  and  $t_1$ <sup>1</sup>. This analysis has been accomplished as example only on *PtSe<sub>2</sub>-CR #1* due to the reproducibility of the behavior of the sensors (figure S1).

## REFERENCES

- (1) Ricciardella, F.; Polichetti, T.; Vollebregt, S.; Alfano, B.; Massera, E.; Sarro, L. Analysis of a Calibration Method for Non-Stationary CVD Multi-Layered Graphene-Based Gas Sensors. *Nanotechnology* **2019**. <https://doi.org/10.1088/1361-6528/ab2aac>.
